# Supplementary material for: Structural origin of light emission in germanium quantum dots
Source: PubMed Central journal article supplement — Sci Rep. 2014 Dec 9;4:7372. doi: 10.1038/srep07372 (PMC4260222; doi:10.1038/srep07372), 2014-12-09
Supplement: srep07372-s1.pdf [file srep07372-s1.pdf]

# Supplementary Information for “Structural origin of light emission in germanium quantum dots.”

W. Little<sup>1</sup>, A. Karatutlu<sup>1</sup>, D. Bolmatov<sup>4</sup>, K. Trachenko<sup>1</sup>, A. V. Sapelkin<sup>1</sup>,

G. Cibin<sup>2</sup>, R. Taylor<sup>2</sup>, F. Mosselmans<sup>2</sup>, A. J. Dent<sup>2</sup>, and G. Mountjoy<sup>3</sup>

<sup>1</sup>*Center for Condensed Matter and Materials Physics, School of Physics and Astronomy,  
Queen Mary, University of London, Mile End Road, London E1 4NS, UK*

<sup>2</sup>*Diamond Light Source Ltd, Didcot OX11 0DE, Oxon, UK*

<sup>3</sup>*School of Physical Sciences, University of Kent, Canterbury, CT2 7NZ, UK and*

<sup>4</sup>*Baker Laboratory, Cornell University, Ithaca, New York 14853, United States*

(Dated: October 17, 2014)

| Fitting Parameters          | EXAFS Refinement Parameters |                     |                     |
|-----------------------------|-----------------------------|---------------------|---------------------|
|                             | Sol-gel                     | Etched (O)          | Etched (H)          |
| N1, set                     | 4 (O)                       | 4 (O)               | 4 (Ge)              |
| R1, Å,                      | $1.724 \pm 0.005$           | $1.744 \pm 0.006$   | $2.450 \pm 0.009$   |
| $S_0^2$                     | $0.868 \pm 0.089$           | $0.625 \pm 0.102$   | $0.518 \pm 0.093$   |
| $\Delta E_0$ , eV           | $3.545 \pm 1.468$           | $2.332 \pm 0.487$   | $2.281 \pm 3.196$   |
| $\sigma^2$ , Å <sup>2</sup> | $0.0018 \pm 0.0008$         | $0.0091 \pm 0.0002$ | $0.0021 \pm 0.0004$ |
| N2, set                     | 4 (Ge)                      | 4 (Ge)              | 12 (Ge)             |
| R2, Å,                      | 2.45 (set)                  | 2.45 (set)          | 4.00 (set)          |
| $\sigma^2$ , Å <sup>2</sup> | $0.002 \pm 0.002$           | $0.001 \pm 0.0008$  | $0.015 \pm 0.004$   |
| N3, set                     | 4 (Ge)                      | 4 (Ge)              | 12 (Ge)             |
| R3, Å,                      | $2.798 \pm 0.024$           | $2.791 \pm 0.007$   | 4.69 (set)          |
| $\sigma^2$ , Å <sup>2</sup> | $0.018 \pm 0.006$           | $0.0013 \pm 0.002$  | $0.018 \pm 0.005$   |

TABLE I: The fitting parameters for transmission EXAFS data including "set" (not refined) parameters. Nearest neighbours only.

| Fitting Parameters          | OD-EXAFS Refinement Parameters |                    |                     |
|-----------------------------|--------------------------------|--------------------|---------------------|
|                             | Sol-gel                        | Etched (O)         | Etched (H)          |
| N, set                      | 4 (O)                          | 4 (O)              | 4 (Ge)              |
| R1, Å,                      | $1.723 \pm 0.014$              | $1.725 \pm 0.025$  | $2.44 \pm 0.01$     |
| $S_0^2$                     | $0.688 \pm 0.091$              | $0.679 \pm 0.087$  | $0.607 \pm 0.099$   |
| $\Delta E_0$ , eV           | $7.303 \pm 2.081$              | $4.876 \pm 2.165$  | $5.879 \pm 1.432$   |
| $\sigma^2$ , Å <sup>2</sup> | $0.0022 \pm 0.012$             | $0.0035 \pm 0.014$ | $0.0044 \pm 0.0015$ |

TABLE II: The fitting parameters for OD-EXAFS data including "set" (not refined) parameters.

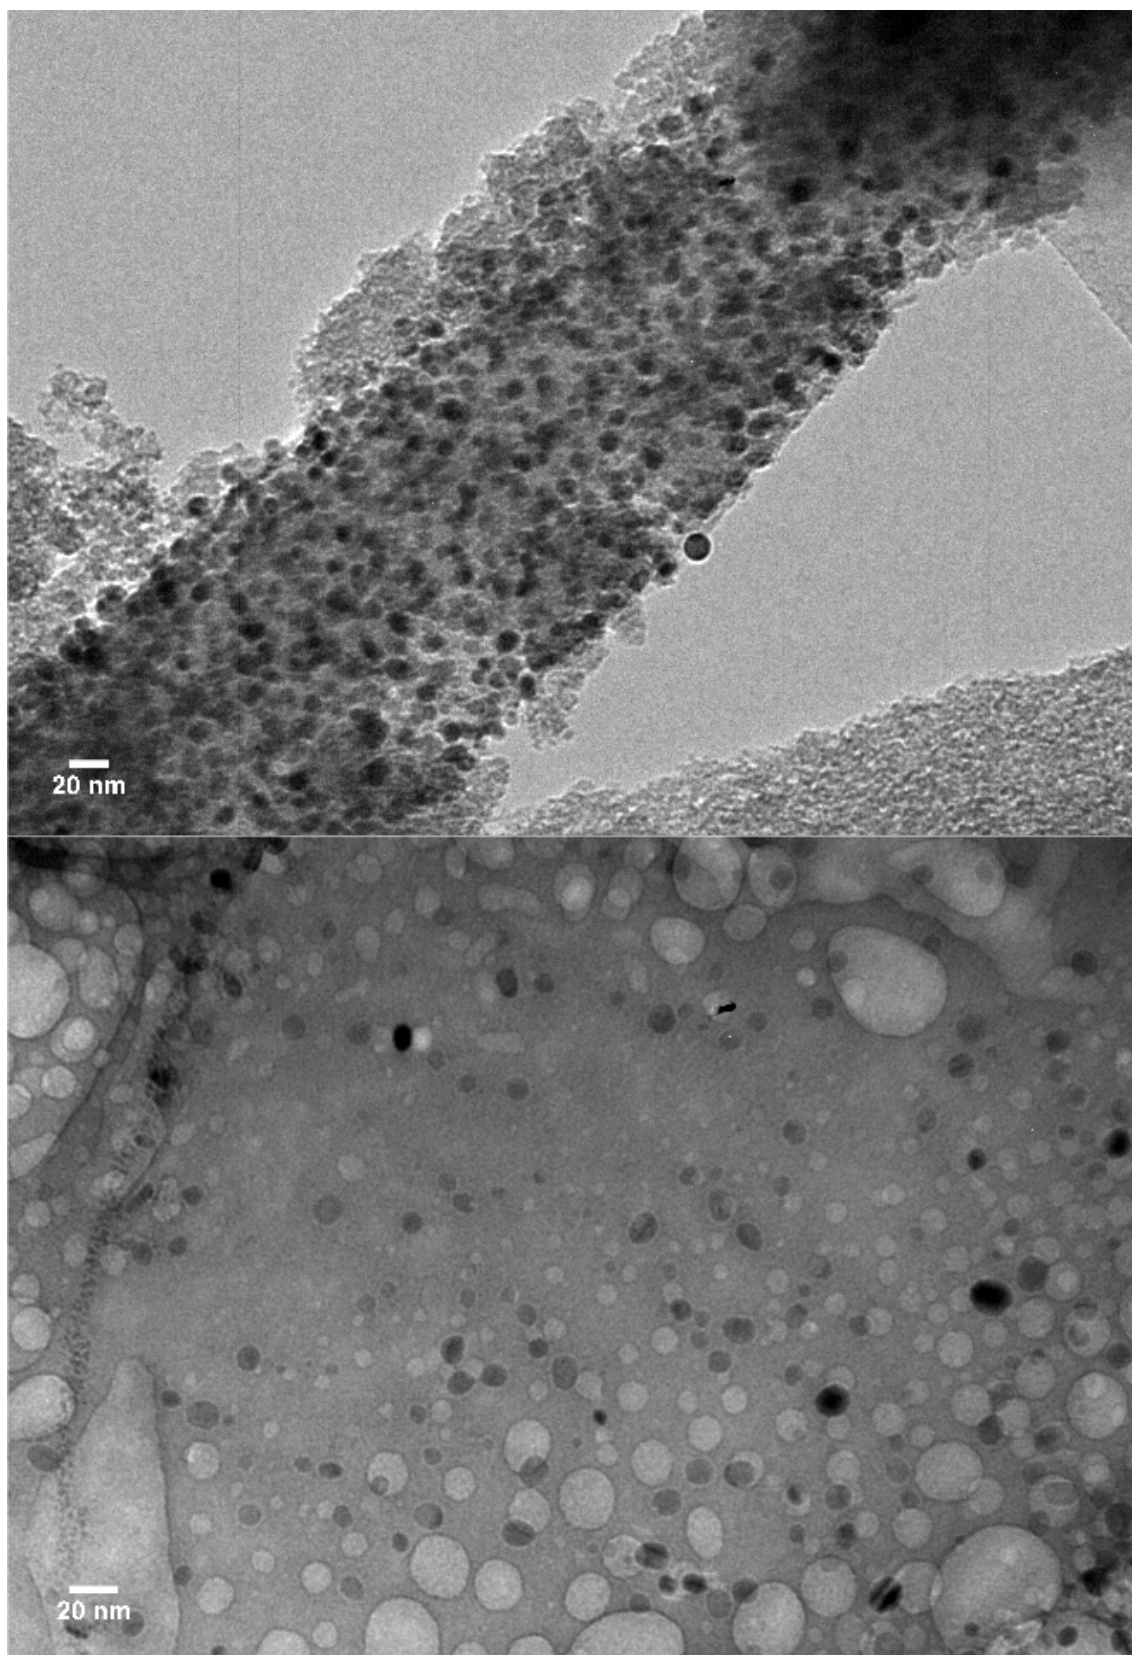

Supplementary figure S1: TEM data for Ge quantum dots. Top, Sol-gel sample. Bottom, Sample prepared by etching. Scale bar is 20 nm.

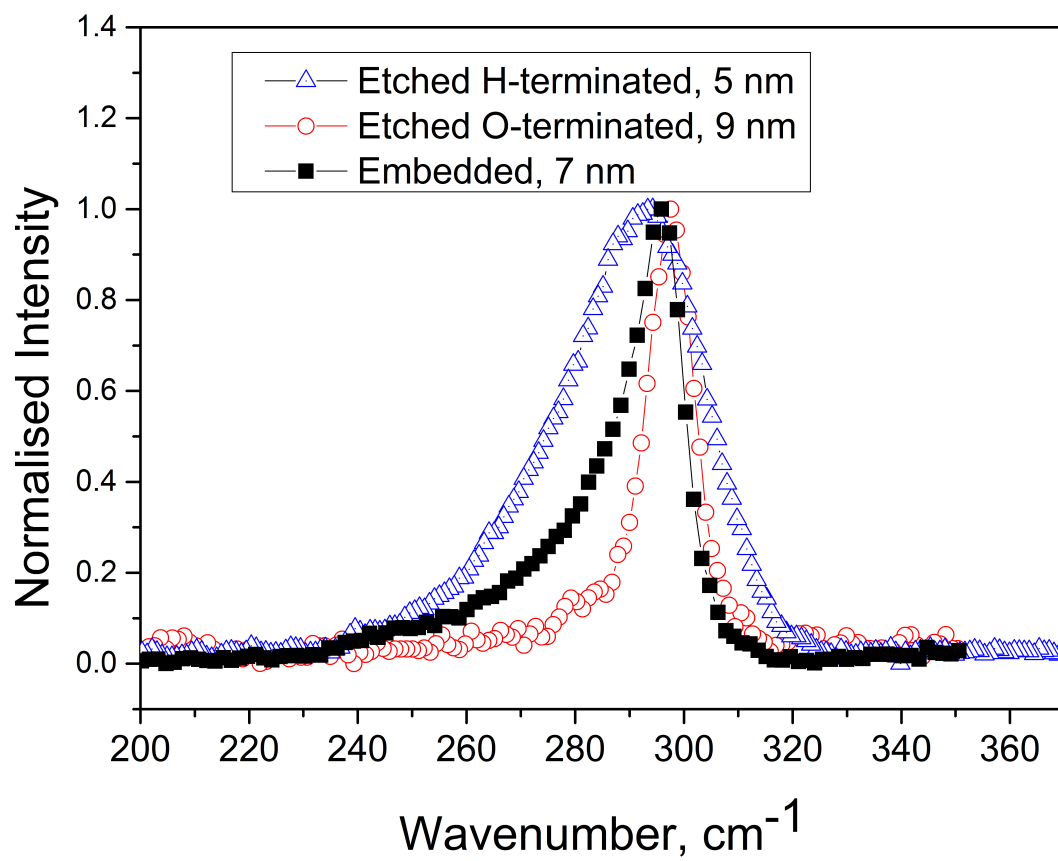

Supplementary figure S2: Raman for all Ge samples. Raman data for sol-gel samples and samples prepared by etching and corresponding average sample sizes.
